# Supplementary material for: Accountable Care Organization Leader Perspectives on the Medicare Shared Savings Program: A Qualitative Study
Source: PubMed Central journal article supplement (PMC10943415; doi:10.1001/jamahealthforum.2024.0126), 2024-03-15
Supplement: jamahealthforum-e240126-s002.pdf [file jamahealthforum-e240126-s002.pdf]

## Data Sharing Statement

Khullar. Accountable Care Organization Leader Perspectives on the Medicare Shared Savings Program. *JAMA Health Forum*. Published March 15, 2024.

doi:10.1001/jamahealthforum.2024.0126

### Data

**Data available:** No

### Additional Information

**Explanation for why data not available:** Data for this study was conducted through semi-structured interviews and participants were assured that all responses would be confidential and anonymous.
